# Supplementary material for: An integrated tsunami inundation and risk analysis at the Makran Coast, Pakistan
Source: Copernicus journal article supplement (doi:10.5194/nhess-2023-148), 2023-09-01
Supplement: Supplementary file 1 [file nhess-2023-148-supplement.pdf]

**Table S1: The compilation of tsunamites discovered at different coasts along the Arabian Sea (sorted age-wise) (Haider et al., 2023)**

| N o. | Event Year (radiometric)                                                                                                         | Event Assigned | Location                                             | Brief detail                                                                                                                                                                                                                                                                                                                                                                                                                                   | Reference                       |
|------|----------------------------------------------------------------------------------------------------------------------------------|----------------|------------------------------------------------------|------------------------------------------------------------------------------------------------------------------------------------------------------------------------------------------------------------------------------------------------------------------------------------------------------------------------------------------------------------------------------------------------------------------------------------------------|---------------------------------|
| 1    | 1948 ± 9 to 1969 ± 10<br>(Back as of 2022)                                                                                       | 1945           | Pindara to Okha, India                               | The documented sand-sheet in the paleo mud flats shows physical, geochemical and biological characteristics such as basal erosional/sharp contact with the underlying unit and lack of sorting along with the presence of mud-clasts. The sedimentary layer also shows an abnormal inland extent of >570 m from the present high-water line.                                                                                                   | (Prizomwala et al., 2022)       |
| 2    | 1945 <sup>a</sup><br>Tsunamigenic earthquake event                                                                               | 1945           | Sur Lagoon, Oman                                     | In this study, particle size, stable isotopic and foraminiferal (taxa and taphonomy) analyses were conducted on surface sediment samples from Sur Lagoon to determine modern spatial trends in the lagoon for future comparison with over-wash sediments deeper in the geologic record                                                                                                                                                         | (Pilarczyk and Reinhardt, 2012) |
| 3    | Older than 1958 <sup>b</sup>                                                                                                     | 1945           |                                                      | 5-25cm thick bed of bivalve shell taphonomy                                                                                                                                                                                                                                                                                                                                                                                                    | (Donato et al., 2008)           |
| 4    | C <sup>14</sup><br>722-905 cal BP                                                                                                | 1000           |                                                      | They reinterpreted the age of 25-cm-thick tsunamigenic layer based on the new discovery of parallel-oriented woody axes in the sedimentological context of the tsunami shell layer in the Sur lagoon. The woody axes were analysed anatomically and identified as pertaining to the grey mangrove <i>Avicennia</i> .                                                                                                                           | (Decker et al., 2022)           |
| 6    | 1508–1681 CE                                                                                                                     | 1524           | Kelshi, India                                        | This laterally extending 30–40-cm-thick tsunamites zone, coinciding with a habitation level, displays varied sedimentary structures including scour-fill features, and is inter-layered with shells, at a height of 3 m from the high-tide level.                                                                                                                                                                                              | (Rajendran et al., 2020)        |
| 7    | C <sup>14</sup> - ~ 872 BP<br>OSL – (Ka)<br>(1130 ± 170) (1110 ± 160)                                                            | 1000           | Fins to Tiwi, Oman                                   | Sedimentological and archaeological evidence for past tsunamis and describe new data on the impact of the 1945 Makran tsunami in Oman.                                                                                                                                                                                                                                                                                                         | (Hoffmann et al., 2020)         |
| 8    | C <sup>14</sup> - (BP)<br>(1565 ± 35)(1930 ± 30)(950 ± 30) (1445 ± 30)<br>OSL – (Ka)<br>(1.11 ± 0.11) (1.18 ± 0.11)(1.29 ± 0.22) | 1000           | Panjour to Luni, India                               | Sedimentology and geochemistry reveal an offshore origin of this sand sheet, from where it was eroded by a high energy wave and deposited in a supratidal environment                                                                                                                                                                                                                                                                          | (Prizomwala et al., 2018)       |
| 9    | OSL –<br>(1.3 ± 0.3) (6.6 ± 0.7)<br>(35.4 ± 4.3)                                                                                 | 1052           | Mundra-Bhadreshwar, Madhavpur-Chorwad, Ratiya, India | GPR studies and trenching the subsurface sand layers shows features that identify and locate features that might have formed during a reported extreme event and its effects. a wave height of ~4–5 m along Saurashtra coast. Southern Owen Ridge is considered as tsunami source.                                                                                                                                                             | (Bhatt et al., 2016)            |
| 10   | 4522 ± 200 BP                                                                                                                    | 4522           | Ras ul Hadd, Oman                                    | Archaeologically rich evidence of past extreme wave events is preserved in the onshore stratigraphic record. Comprehensive mapping and analysis of extreme wave deposits suggests an Early Bronze Age.                                                                                                                                                                                                                                         | (Hoffmann et al., 2015)         |
| 11   | 5840 ± 30 BP                                                                                                                     | 5840           | Fins, Oman                                           | Investigated coarse- to fine- grained, marine tsunami deposits using GPR. Wedging out of sediments and fining inland features, as well as several erosion features at the base of the deposit. Minimum calculated runup height of >17m.                                                                                                                                                                                                        | (Koster et al., 2014)           |
| 12   |                                                                                                                                  |                | Ramin, Iran                                          | The boulders, weighing up to 18 t, are found up to 6 m above present mean sea level and up to 40 m from the present shoreline.                                                                                                                                                                                                                                                                                                                 | (Shah-Hosseini et al., 2011)    |
| 13   |                                                                                                                                  |                | Dive Agar, India                                     | Sediment signatures at the two nearby beach sites on the west Two sedimentary deposits are inferred as indicative of two palaeo tsunami events relating to the Sunda Arc in the south and the Makran tectonic zone in the north. The occurrence of sporadic boulders, wedge- shaped heavy mineral sand layers and capping of the deposit by a pedogenic surface at Guhagar depicts an older tsunami of larger magnitude compared to Dive Agar. | (Sangode and Meshram, 2013)     |
| 14   |                                                                                                                                  |                | Guhagar, India                                       |                                                                                                                                                                                                                                                                                                                                                                                                                                                |                                 |
| 15   |                                                                                                                                  |                | Fins to Sur, Oman                                    | The blocks occur as individual rocks of up to 120 tons, as imbricated sets and as ‘‘boulder trains                                                                                                                                                                                                                                                                                                                                             | (Hoffmann et al., 2013)         |

<sup>a</sup> Age based on foraminiferal provenance and taphonomy

<sup>b</sup> Age Based on Pb<sup>210</sup> (n=1). Sample immediately above the tsunamites

**Simulations:**

- Supplements: Simulations-1 Fins-Sur, Oman
- Supplements: Simulations-2 Pasni 7 m scenario
- Supplements: Simulations-3 Pasni 10 m scenario
- Supplements: Simulations-4 Pasni 15 m scenario
- Supplements: Simulations-5 Gwadar 5 m scenario
- Supplements: Simulations-6 Gwadar 7 m scenario
- Supplements: Simulations-7 Gwadar 10 m scenario
- Supplements: Simulations-8 Gwadar 15 m scenario
- Supplements: Simulations-9 Pasni same wave height (5m) but different wavelength (3km, 15km) comparison
- Supplements: Simulations-10 Schematic nesting tiers
